# Supplementary material
Source: publisher figshare collection journal article supplement (https://sage.figshare.com/ndownloader/files/20020772)
Supplement: Supplementary file 1 [file 20020772]

| Study         | Study Design              | LOE | Inclusion Criteria                                                                                    | Exclusion Criteria                                                                                                                                                                                                                                                                                                                                            | # Pts (knees) | % Male                  | Age (Yr)                       | FU (Mo)     | % Lost FU | MINORS |
|---------------|---------------------------|-----|-------------------------------------------------------------------------------------------------------|---------------------------------------------------------------------------------------------------------------------------------------------------------------------------------------------------------------------------------------------------------------------------------------------------------------------------------------------------------------|---------------|-------------------------|--------------------------------|-------------|-----------|--------|
| Bastard       | Case Series               | IV  | Athletic patients <60 years old HTO for medial tibiofemoral OA                                        | Knee contractures<br>No regular physical activity                                                                                                                                                                                                                                                                                                             | 30 (30)       | 20%                     | 55.6                           | 15.6        | 0%        | 8      |
| Bode          | Case Series               | IV  | Circumscribed full-thickness cartilage defects of MFC with ICRS Grade III or IV                       | Full-thickness cartilage defects of medial compartment (i.e. kissing)<br>Lateral FT/PF compartment cartilage loss<br>Loss of lateral meniscus<br>BMI >35 kg/m <sup>2</sup><br>Active knee flexion <120°, extension deficit >10°<br>High-grade ligamentous instability<br>History of fracture of affected limb<br>Active infection<br>Inflammatory arthropathy | 40 (40)       | NA                      | 37.6 ± 7.5                     | 6.05 ± 2.5  | 0%        | 11     |
| Bonnin        | Case Series               | IV  | OA of the medial TF compartment, grade II or III                                                      | Previous contralateral operation/pathology                                                                                                                                                                                                                                                                                                                    | 267 (267)     | 70.40%                  | 59.1 ± 8.4                     | 49.8 ± 10.9 | 47.90%    | 8      |
| Collins       | Case Series               | IV  | Age 15-65 yr<br>No previous fractures or internal fixation of knee<br>24 months since index procedure | Abnormal anatomic lateral distal femoral articular angle (<81)                                                                                                                                                                                                                                                                                                | 21 (22)       | 54.50%                  | 39 ± 13.2                      | 52          | 4.30%     | 12     |
| Cotic         | Case Series               | III | PTO for varus malalignment combined with medial OA or MFC defects requiring cartilaginous repair      | ICRS Grade III/IV lesions of medial compartment<br>Absence/extensive loss of the lateral meniscus<br>Complex high-grade ligamentous instabilities<br>ICRS grade IV patellofemoral osteoarthritis<br>Range of motion < 120° or flexion contracture >5°                                                                                                         | 28 (28)       | 67.90%                  | 45 ± 11                        | 24 ± 2      | 3.60%     | 15     |
| Faschingbauer | Case Series               | IV  | Unicompartmental varus OA                                                                             | BMI >35 kg/m <sup>2</sup><br>ICRS III/IV lesion to LFC<br>Loss of lateral meniscus<br>Extension deficit >15°<br>Severe ligament deficiencies                                                                                                                                                                                                                  | 51 (51)       | 74.40%                  | 42 ± 11.2                      | 22 ± 9.3    | 15.70%    | 8      |
| Hevesi        | Retrospective Cohort      | III | PTO with previous conventional or modern plate fixation<br>Consented for research                     | Lack of knee radiographs both before and after HTO<br>HTO for osteonecrosis<br><2 years of follow-up                                                                                                                                                                                                                                                          | 90 (95)       | 62.10%                  | 38.5 ± 10.3                    | 50.4        | 29.10%    | 7      |
| Hoell         | Retrospective Comparative | III | Younger, active patients<br>Varus gonarthrosis                                                        | History of injury to the ipsilateral knee capsule<br>Concomitant or history of ligamentous injury to ipsilateral knee                                                                                                                                                                                                                                         | 108 (108)     | OW: 62.7%;<br>CW: 70.2% | OW: 46.4 ± 8<br>CW: 52.1 ± 8.4 | 22.5        | 21.60%    | 14     |

|            |                           |     |                                                                                                               |                                                                                                                                                                                                                                                                                                                        |         |        |             |            |        |    |
|------------|---------------------------|-----|---------------------------------------------------------------------------------------------------------------|------------------------------------------------------------------------------------------------------------------------------------------------------------------------------------------------------------------------------------------------------------------------------------------------------------------------|---------|--------|-------------|------------|--------|----|
| Ishimatsu  | Retrospective Comparative | III | Skeletally mature patients<br>Symptomatic medial OA<br>Genu varus alignment                                   | Follow-up <5 years<br>Lack of any pre/postoperative radiographs or outcome scores                                                                                                                                                                                                                                      | 48 (57) | 24.60% | 64.2 ± 6.9  | 65.5 ± 5.6 | 10.30% | 9  |
| Isolaori   | Retrospective Comparative | IV  | Receipt of PTO                                                                                                | NA                                                                                                                                                                                                                                                                                                                     | 50 (50) | 30%    | 58          | NA         | NA     | 7  |
| Kin        | Prospective Cohort        | II  | ≤65 years of age with isolated medial compartment OA<br>Absence of ligament instability                       | Diagnosis of traumatic OA<br>Inflammatory arthritis or osteonecrosis<br>Symptomatic lateral or PF OA<br>History of knee joint infection                                                                                                                                                                                | 91 (91) | 6.60%  | 56.1 ± 6.2  | 24         | 2.20%  | 18 |
| Korovessis | RCT                       | II  | Agriculatural employment<br>Unicompartmental medial degenerative varus OA<br>No history previous knee surgery | Rheumatoid or posttraumatic arthritis<br>Knee extension deviation >20°, ROM<60°<br>2-compartment femorotibial arthritis                                                                                                                                                                                                | 63 (63) | 11.11% | 65          | 132        | 7.90%  | 14 |
| Kubota     | Retrospective Comparative | III | Primary medial OA treated with OWHTO                                                                          | Symptomatic PF or lateral compartment OA<br>Rheumatoid arthritis, a knee range of movement < 100°, high-grade ligamentous instabilities, and extensive loss or absence of the lateral meniscus                                                                                                                         | 69 (71) | 39.40% | 57          | NA         | NA     | 8  |
| Laprade    | Case Series               | IV  | Skeletally mature patients<br>Medial knee OA<br>Genu varus alignment                                          | No pain relief with the unloader brace<br>Concomitant procedures other than arthroscopy/ meniscal lesions<br>Osteotomy as the first stage of future ligamentous/MAT<br>Lack of tobacco cessation<br>Inflammatory arthritis or Osteonecrosis<br>Corticosteroid use<br>Lateral compartment OA<br>Kellgren-Lawrence 3+ OA | 47 (47) | 68.10% | 40.5        | 43.2       | 20.33% | 10 |
| Minzlaff   | Case Series               | IV  | Regular sport participation<br>2 year follow-up<br>Age <40 year at time of surgery                            | NA                                                                                                                                                                                                                                                                                                                     | 30 (30) | NA     | 31 ± 6      | 82         | 0%     | 10 |
| Nagel      | Case Series               | IV  | Receipt of PTO                                                                                                | NA                                                                                                                                                                                                                                                                                                                     | 34 (37) | 100%   | 49          | 96         | 6.41%  | 6  |
| Niemeyer   | Case Series               | IV  | Varus malalignment<br>Symptomatic medial OA                                                                   | ICRS grade III or IV lesions<br>Flexion <90°, extension deficit >10°<br>History of lower limb fracture                                                                                                                                                                                                                 | 43 (43) | 86.05% | 47.3 ± 10.3 | 24 ± 4     | 6.50%  | 13 |
| Ogawa      | Case Series               | IV  | Receipt of OWHTO                                                                                              | ACL rupture<br>Lack of second-look arthroscopy                                                                                                                                                                                                                                                                         | 67 (74) | 28.40% | 63.5 ± 7.8  | 30 ± 6.5   | 0.00%  | 10 |

|              |                           |     |                                                                                                                                              |                                                                                                                                                                                                                                                 |          |        |             |           |        |    |
|--------------|---------------------------|-----|----------------------------------------------------------------------------------------------------------------------------------------------|-------------------------------------------------------------------------------------------------------------------------------------------------------------------------------------------------------------------------------------------------|----------|--------|-------------|-----------|--------|----|
| Otsuki       | Retrospective Comparative | III | Receipt HTO from 2012 to 2016                                                                                                                | NA                                                                                                                                                                                                                                              | 48 (48)  | 54.20% | 66.8 ± 8.5  | 31        | NA     | 14 |
| Park         | Case Series               | IV  | Medial OA (KL II-IV)<br>Varus deformity >10°                                                                                                 | Flexion contracture >15° or flexion angle <90°,<br>Lateral compartment OA (KL III-IV)<br>Lateral tibial subluxation >10 mm<br>Expected postoperative joint line obliquity after HTO >5°<br>Inflammatory or traumatic arthritis                  | 94 (100) | 7%     | 58.7 ± 7.4  | 52.8      | NA     | 12 |
| Peterson     | Retrospective Comparative | IV  | 55 to 65 years<br>Medial OA<br>Varus malalignment<br>Receipt of OWHTO or UKA                                                                 | Ahlback Grade III-V OA<br>ACL insufficiency                                                                                                                                                                                                     | 48 (48)  | 29.20% | 58.9 ± 2.8  | 82.1      | 11.11% | 9  |
| Roberson     | Cohort Study              | III | Age <55 years receiving HTO<br>Mechanical axis malalignment<br>Higher desired activity level (Tegner >3)<br>Inappropriate candidates for UKA | Age ≥55 years<br>Lower desired activity level (Tegner <3)<br>Lack of motivation<br>Patients who are better candidates for UKA                                                                                                                   | 41 (41)  | 68.30% | 44          | 39        | 22.32% | 15 |
| Saier        | Case Series               | II  | Medial compartment OA<br>Varus ≥3°<br>Age 18-65 years<br>VAS ≥3                                                                              | Patients receiving DFO<br>Preoperative ligamentous instability<br>Receipt of additional cartilage therapy<br>History of chronic metabolic/neoplastic/arthritis disorders                                                                        | 75 (75)  | 61.30% | 45.5        | NA        | 14.7   | 10 |
| Salzmann     | Case Series               | IV  | Age <65 years<br>Symptomatic medial varus<br>OA with tibial deformity                                                                        | BMI >35 kg/m <sup>2</sup><br>Lateral meniscal loss/absence<br>Outerbridge Grade III-IV<br>Extensive PF OA<br>Knee flexion <120° or extension deficit >20°<br>High-grade ligamentous instability<br>Active infection or inflammatory arthropathy | 80 (80)  | 78.50% | 41.2 ± 5.6  | 36        | 18.8   | 9  |
| Saragaglia   | Case Series               | IV  | Medial TF OA                                                                                                                                 | NA                                                                                                                                                                                                                                              | 95 (97)  | 67.00% | 50.4 ± 9.53 | 69 ± 16.2 | 12.6   | 11 |
| Schallberger | Case Series               | IV  | Frontal plane valgisation                                                                                                                    | NA                                                                                                                                                                                                                                              | 71 (72)  | 68.50% | 40 [median] | 198       | 23.9   | 10 |
| Schroter     | Case Series               | IV  | Medial compartment OA<br>Varus limb malalignment<br>Intact lateral joint compartment with ICRS ≤1                                            | History of osteoporosis and any bone disorder<br>BMI >35 kg/m <sup>2</sup><br>Active infection<br>Range of motion ≤100°                                                                                                                         | 35 (35)  | 68.90% | 47 ± 9.2    | 77 ± 19   | NA     | 10 |

|              |              |     |                                                                                                                                                                                                                           |                                                                                                                                                                                                                            |           |        |                |      |        |    |
|--------------|--------------|-----|---------------------------------------------------------------------------------------------------------------------------------------------------------------------------------------------------------------------------|----------------------------------------------------------------------------------------------------------------------------------------------------------------------------------------------------------------------------|-----------|--------|----------------|------|--------|----|
| Seil         | RCT          | I   | Medial compartment OA<br>Varus alignment angle $\geq 5^\circ$                                                                                                                                                             | Lateral compartment OA<br>Flexion contracture $>10^\circ$<br>Symptomatic knee instability<br>Rheumatoid arthritis<br>Previous knee infection or angulated fracture<br>History of or current smoker<br>Weight $\geq 120$ kg | 70 (70)   | 53.00% | 50             | 24   | 0      | 18 |
| Takeuchi     | Case Series  | IV  | Medial compartment OA or ON<br>Varus malalignment<br>Failed conservative management 3+ mo<br>Isolated medial compartment OA<br>Compliance with rehabilitation program $\geq 15^\circ$ extension, $\geq 120^\circ$ flexion | Current or history of knee infection<br>Severe PF OA o<br>Femorotibial angle $>185^\circ$ ( $5^\circ$ anatomic varus)<br>Flexion contracture $>15^\circ$                                                                   | 52 (57)   | 30%    | 67             | 15   | 0      | 12 |
| Van Leishout | Cohort Study | III | $>18$ years<br>Unilateral/bilateral varus-producing MCWHTO<br>Minimum follow-up of 6 months                                                                                                                               | Double-level knee osteotomy<br>Amputation of the operated leg<br>Medial reefing procedure<br>Deceased                                                                                                                      | 176 (176) | 19.90% | $50 \pm 11.5$  | 54   | 35.80% | 9  |
| Waterman     | Case Series  | IV  | Medial gonarthrosis                                                                                                                                                                                                       | Non-active members of the military<br>$<2$ years of follow-up<br>Recognized miscoding when conducting chart review                                                                                                         | 181 (202) | 93.10% | 35.7           | 47.5 | 0      | 9  |
| W-Dahl       | Case Series  | IV  | Radiographic knee OA<br>Symptomatic knee OA<br>Varus knee alignment                                                                                                                                                       | Concomitant surgery<br>Bilateral surgery within one year                                                                                                                                                                   | 79 (79)   | 64.60% | $52.8 \pm 6.2$ | 120  | 19.5   | 11 |
| Yim          | Case Series  | IV  | Age $<65$ years<br>Valgus OWHTO or UKA<br>Medial OA KL Grade $\geq$ II                                                                                                                                                    | Lateral of PF OA KL grade II+<br>Knee flexion $<120^\circ$ or flexion contracture $>20^\circ$<br>Ligament instability<br>Inflammatory arthropathy                                                                          | 108 (108) | 6.50%  | $58.3 \pm 5.4$ | 43.2 | 22.00% | 10 |
